# Supplementary material
Source: PubMed Central journal article supplement (PMC3024900)
Supplement: supp_jlb.0710395_2AB0710-395_suppl_fig_1.pdf [file supp_jlb.0710395_2AB0710-395_suppl_fig_1.pdf]

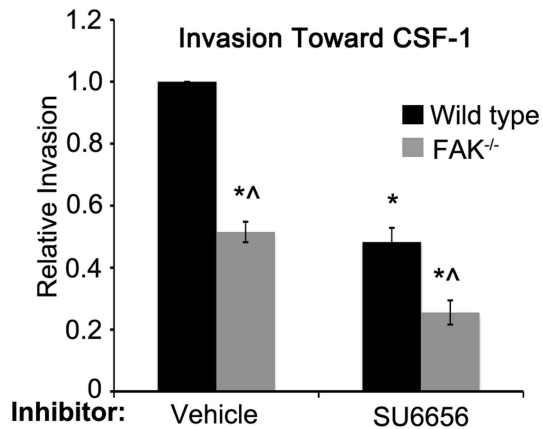

**Supplementary Figure 1. FAK and Src regulate CSF-1-dependent macrophage invasion through separate signaling pathways.** Relative invasion towards CSF-1 of WT and FAK<sup>-/-</sup> BMMs treated with vehicle or SU6656. \* denotes values that are significantly different from vehicle-treated WT cells. ^ denote values that are significantly different from WT cells under the same treatment conditions. n = 4
